# Supplementary material for: Effectiveness of Workplace Interventions to Improve Health and Well-Being of Health and Social Service Workers: A Narrative Review of Randomised Controlled Trials
Source: MDPI journal article supplement (doi:10.3390/healthcare11121792), 2023-06-17
Supplement: s1 [file s1]

**Table S1.** Characteristics of the studies included in the review in chronological order.

| 1st Author and Year of Publication | Country   | Study Population         | Design      | Follow-Up Time             | Age at Baseline                           | Sex       | Sample Size                          |         |       | Intervention                                                                                 |                                                                                                                                                                                                                                 |          |                                                          | Control                                                 | Outcome                                                         | Results                                                                                                                                                                                                                                                                                                                                                                                          |
|------------------------------------|-----------|--------------------------|-------------|----------------------------|-------------------------------------------|-----------|--------------------------------------|---------|-------|----------------------------------------------------------------------------------------------|---------------------------------------------------------------------------------------------------------------------------------------------------------------------------------------------------------------------------------|----------|----------------------------------------------------------|---------------------------------------------------------|-----------------------------------------------------------------|--------------------------------------------------------------------------------------------------------------------------------------------------------------------------------------------------------------------------------------------------------------------------------------------------------------------------------------------------------------------------------------------------|
|                                    |           |                          |             |                            |                                           |           | Intervention n                       | Control | Total | Type                                                                                         | Frequency                                                                                                                                                                                                                       | Duration | Place                                                    |                                                         |                                                                 |                                                                                                                                                                                                                                                                                                                                                                                                  |
| Barene 2014 [35] and 2022 [45]     | Norway    | Hospital employees       | Cluster RCT | 12 and 40 weeks            | 25 to 65 years. Mean age 46.1 ± 9.2 years | Women     | 37 football group and 35 Zumba group | 35      | 107   | Football matches or Zumba training                                                           | An hour session 2–3 times a week                                                                                                                                                                                                | 40 weeks | Outside working hours using external training facilities | No intervention                                         | Work ability, self-rated health, and emotional well-being       | No significant changes in work ability were found in both intervention groups after 12 and 40 weeks. Self-rated health was higher in Zuma group compared with control group at 40 weeks follow-up (mean difference 95%, $p = 0.025$ ) but no difference was found between football and control groups. Emotional well-being at follow-up did not differ between intervention and control groups. |
| Booker 2022 [137]                  | Australia | Healthcare shift workers | Cluster RCT | 6 months post-intervention | Mean age 34.7 ± 12.0 years                | 96% women | 79                                   | 70      | 149   | An educational and individualized program to manage sleep and the consequences of shift work | Bright light exposure for 20 min at a time during writing notes, breaks, or before driving home, frequent caffeine consumption (every 2 h until 6 h before sleeping), and a prescription of melatonin for those whose insomnia, | 8 weeks  | During work hours                                        | 8-week education on the benefits of a low glycemic diet | Sickness absence Register data on sickness absence for 6 months | Sickness absence did not differ between intervention and control wards.                                                                                                                                                                                                                                                                                                                          |



|                      |           |                                         |                 |                                                                                          |                                                                                                    |                                                                   |                                                                               |    |     |                                                                                                                                     |                                                                                                                                       |                                 |                    |                 |                                                                                                              |                                                                                                                                                                                                                                                                  |
|----------------------|-----------|-----------------------------------------|-----------------|------------------------------------------------------------------------------------------|----------------------------------------------------------------------------------------------------|-------------------------------------------------------------------|-------------------------------------------------------------------------------|----|-----|-------------------------------------------------------------------------------------------------------------------------------------|---------------------------------------------------------------------------------------------------------------------------------------|---------------------------------|--------------------|-----------------|--------------------------------------------------------------------------------------------------------------|------------------------------------------------------------------------------------------------------------------------------------------------------------------------------------------------------------------------------------------------------------------|
| Errazuriz 2022 [113] | Chile     | Healthcare workers                      | Individualy RCT | Post-intervention (2 weeks after completing intervention) and 4 months post-intervention | Mean age 40.2 ± 11.7 years                                                                         | 97.1% of intervention groups and 100% of control group were women | N = 35 mindfulness-based stress reduction and N = 34 stress management course | 36 | 105 | Mindfulness-based stress reduction intervention.                                                                                    | A 2-h weekly session for mindfulness-based stress reduction.                                                                          | 8 weeks                         | On weekdays        | No intervention | Job satisfaction                                                                                             | Mindfulness-based stress reduction statistically significantly improved job satisfaction at post-intervention but not at 4-month follow-up                                                                                                                       |
|                      |           |                                         |                 |                                                                                          |                                                                                                    |                                                                   |                                                                               |    |     | Stress management course                                                                                                            | Stress management course offered lectures about efficient coping strategies                                                           |                                 |                    |                 | It was assessed using the Job Satisfaction Scale                                                             | Stress management course had no effect on job satisfaction. Emotional exhaustion decreased in the intervention group by 3.26 ± 1.25 points while it increased by 1.07 ± 1.12 points in control group ( $p = 0.01$ for between-group difference) during follow-up |
| Fainstad 2022 [83]   | USA       | Resident physicians                     | Individualy RCT | 6 months                                                                                 | Mean age 29.4 ± 2.3 years                                                                          | Women                                                             | 50                                                                            | 51 | 101 | Web-based professional group-coaching                                                                                               | Two 1-h group-coaching per week on a video-conferencing platform, unlimited anonymous written coaching, and weekly self-study modules | 6 months (45 coaching sessions) | Weekdays at 7–8 PM | No intervention | Burnout (emotional exhaustion, and personal accomplishment) measured with the Maslach Burnout Inventory      | Depersonalization and personal accomplishment did not differ between intervention and control groups                                                                                                                                                             |
| Fong 2022 [44]       | Hong Kong | Nurses working at a university hospital | Individualy RCT | 10 days                                                                                  | 21 years or older. 31.6% of intervention group and 34.2% of control group were older than 40 years | 93.5% were women                                                  | 39                                                                            | 38 | 77  | Mindful colouring. Watching a 3-min instructional video and colouring mandalas for at least five working days or 100 min in 10 days | Daily                                                                                                                                 | 10 days                         | Workplace          | No intervention | Mental well-being was assessed using a 7-item scale and burnout was measured using Maslach Burnout Inventory | The intervention had no effects on mental well-being and burnout (emotional exhaustion, depersonalization, and personal achievement)                                                                                                                             |

|                     |             |                                            |                  |          |                                                                                                      |                  |    |    |    |                                                                                                                                                                                         |                                                                                         |          |                                   |                                                                    |                                                                                                                                 |                                                                                                                                                                                                                                                                                                       |
|---------------------|-------------|--------------------------------------------|------------------|----------|------------------------------------------------------------------------------------------------------|------------------|----|----|----|-----------------------------------------------------------------------------------------------------------------------------------------------------------------------------------------|-----------------------------------------------------------------------------------------|----------|-----------------------------------|--------------------------------------------------------------------|---------------------------------------------------------------------------------------------------------------------------------|-------------------------------------------------------------------------------------------------------------------------------------------------------------------------------------------------------------------------------------------------------------------------------------------------------|
| Gerodimos 2022 [41] | Greece      | Health professionals working at a hospital | Individual y RCT | 6 weeks  | 40–55 years. Mean age 44.4 ± 6.2 for intervention group and 44.3 ± 5.7 for control group             | 75% were women   | 25 | 25 | 50 | Supervised workplace exercises consisting of stretching, strengthening, aerobic dance and balance exercises                                                                             | Two 15–20 min sessions per day (2–3-h rest between them) for 5 days a week              | 6 weeks  | Workplace                         | No intervention                                                    | Perceived well-being was assessed with the 5-item Subjective Vitality Scale                                                     | Perceived well-being improved in intervention group ( $p < 0.001$ ) but no change was found in control group at follow-up. The difference between two groups was significant ( $p < 0.001$ )<br>The intervention statistically significantly improved job satisfaction and reduced compassion fatigue |
| Goktas 2022 [110]   | Turkey      | Day shift emergency nurses                 | Individual y RCT | 21 days  | Mean age 29.8 ± 7.5 years for intervention group and 28.7 ± 6.9 years for control group              | 48.3% were women | 30 | 30 | 60 | Short motivational mobile phone messages                                                                                                                                                | 3 times per day                                                                         | 21 days  | During work time                  | No intervention                                                    | A 5-item scale was used to measure job satisfaction and a 13-item scale to measure compassion fatigue                           | There were also significant differences in trauma and occupational burnout subscales of compassion fatigue between intervention and control groups                                                                                                                                                    |
| Ha 2022 [53]        | South Korea | Nurses working rotating shifts             | Cluster RCT      | 12 weeks | 19–60 years. Mean age 27.6 ± 3.1 years for intervention group and 27.0 ± 3.7 years for control group | Women            | 30 | 27 | 57 | A mobile wellness program to promote physical activity and improve sleep quality by providing Fitbit, online exercises via Zoom, online health coaching, and motivational text messages | Daily walking, online exercises for 1-h twice a week, and weekly online health coaching | 12 weeks | Outside of work hours             | Controls received a Fitbit for monitoring their activity and sleep | Wellness was measured using the 18-item wellness index<br>Fatigue was measured using the 19-item Multidimensional Fatigue Scale | The intervention statistically significantly improved wellness but had no effect on self-rated fatigue                                                                                                                                                                                                |
| Hata 2022 [96]      | USA         | Clinical physicians, nurse                 | Individual y RCT | 3 months | Not reported                                                                                         | 96% were women   | 14 | 11 | 25 | Self-facilitated discussion over                                                                                                                                                        | One meeting per month                                                                   | 3 months | 2 meetings at hospital and one at | Self-facilitated discussion over                                   | Burnout and work engagement                                                                                                     | Overall burnout, emotional exhaustion and                                                                                                                                                                                                                                                             |

|                 |       |                                                                                                             |                |                       |                                                                                                            |                  |    |    |    |                                                                                                                                                                                       |                                                                                                                                                                           |           |                       |                                                |                                                                                                                 |                                                                                                                                                                                                                             |
|-----------------|-------|-------------------------------------------------------------------------------------------------------------|----------------|-----------------------|------------------------------------------------------------------------------------------------------------|------------------|----|----|----|---------------------------------------------------------------------------------------------------------------------------------------------------------------------------------------|---------------------------------------------------------------------------------------------------------------------------------------------------------------------------|-----------|-----------------------|------------------------------------------------|-----------------------------------------------------------------------------------------------------------------|-----------------------------------------------------------------------------------------------------------------------------------------------------------------------------------------------------------------------------|
|                 |       | practitioners, and certified nurse midwives                                                                 |                |                       |                                                                                                            |                  |    |    |    | dinner with a one-page discussion guide                                                                                                                                               |                                                                                                                                                                           |           | a local restaurant    | dinner on any subject                          | Emotional exhaustion and depersonalization were measured using a single item from the Maslach Burnout Inventory | depersonalization decreased, and work engagement increased at 3-month follow-up in both groups                                                                                                                              |
|                 |       |                                                                                                             |                |                       |                                                                                                            |                  |    |    |    |                                                                                                                                                                                       |                                                                                                                                                                           |           |                       |                                                | Work engagement was assessed using the 9-item Utrecht Work Engagement Scale                                     | There were no differences between intervention and control groups                                                                                                                                                           |
|                 |       |                                                                                                             |                |                       |                                                                                                            |                  |    |    |    |                                                                                                                                                                                       |                                                                                                                                                                           |           |                       |                                                |                                                                                                                 | The intervention reduced emotional exhaustion (difference between groups $-5.4, p = 0.006$ )                                                                                                                                |
| Joshi 2022 [80] | USA   | Healthcare professionals with distress (score 6 or higher based on 10-point Single Units of Distress Scale) | Individual RCT | 1 and 3 months        | Mean age $40 \pm 11$ years                                                                                 | 82.5% were women | 41 | 39 | 80 | Transcendental meditation                                                                                                                                                             | The intervention group received 5 instruction sessions in 5 days and 20 min meditation twice a day                                                                        | 3 months  | Outside working hours | Usual treatment (access to wellness resources) | Burnout (emotional exhaustion, and personal accomplishment) measured with the Maslach Burnout Inventory         | Depersonalization was non-significantly lower (difference between groups $-1.7, p = 0.08$ ) and personal accomplishment was non-significantly higher (difference between groups $1.9, p = 0.11$ ) in the intervention group |
| Lin 2022 [34]   | China | Young dental professionals (dentists, dental nurses, and dental assistants)                                 | Cluster RCT    | 3, 6, 9 and 12 months | Younger than 35 years. mean age $27.1 \pm 5.3$ for intervention group and $28.3 \pm 6.0$ for control group | 66.8% were women | 88 | 99 |    | Participatory ergonomic changes consisted of adjustment in posture, reduction in repetitive movements, teaching proper tool usage, and work break arrangement and change in work time | A 45-min ergonomic lecture, and then an ergonomist spent 0.5 to 2 h 3 times a week until no changes were needed. A total of 235 ergonomic changes were made within a year | 12 months | Workplace             | Controls received a 45-min ergonomic lecture   | Work ability It was measured by 7-item Work Ability Index                                                       | Work ability index did not differ between intervention and control groups at 3- and 6-month follow-up It slightly improved in intervention group compared with control group at 9                                           |



|                                 |             |                                                                  |                   |                   |                                                                                                          |                     |     |     |     |                                                                   |                                                                                                                        |          |                 |                                                       |                                                                                                                 |  |                                                                                                                                                                                |                                                                                                                                                                 |
|---------------------------------|-------------|------------------------------------------------------------------|-------------------|-------------------|----------------------------------------------------------------------------------------------------------|---------------------|-----|-----|-----|-------------------------------------------------------------------|------------------------------------------------------------------------------------------------------------------------|----------|-----------------|-------------------------------------------------------|-----------------------------------------------------------------------------------------------------------------|--|--------------------------------------------------------------------------------------------------------------------------------------------------------------------------------|-----------------------------------------------------------------------------------------------------------------------------------------------------------------|
|                                 |             |                                                                  |                   |                   | 40.6 ± 11.0<br>for control<br>group                                                                      |                     |     |     |     | for<br>psychoeducation)                                           |                                                                                                                        |          |                 |                                                       |                                                                                                                 |  | Emotional<br>exhaustion,<br>depersonalization,<br>and personal<br>accomplishment<br>were measured<br>using Maslach<br>Burnout Inventory                                        | effects on burnout<br>(emotional<br>exhaustion,<br>depersonalization<br>, and personal<br>accomplishment)<br>and sickness<br>absence                            |
|                                 |             |                                                                  |                   |                   |                                                                                                          |                     |     |     |     |                                                                   |                                                                                                                        |          |                 |                                                       |                                                                                                                 |  | Sickness absence<br>was measured<br>using a self-<br>reported number<br>of sickness absence<br>days in past three<br>months<br>Burnout, job<br>demands and job<br>satisfaction |                                                                                                                                                                 |
|                                 |             |                                                                  |                   |                   |                                                                                                          |                     |     |     |     |                                                                   |                                                                                                                        |          |                 |                                                       |                                                                                                                 |  | Burnout was<br>measured using<br>the 20-item Dutch<br>version of the<br>Maslach Burnout<br>Index: the Utrecht<br>Burnout Scale—C                                               | The intervention<br>had no effects on<br>emotional<br>exhaustion,<br>depersonalization<br>, personal<br>accomplishment,<br>job demands, and<br>job satisfaction |
| Bielderman<br>2021 [100]        | Netherlands | Nursing staff<br>working in<br>dementia<br>special care<br>units | Cluster<br>RCT    | 3 and 9<br>months | Mean age<br>41.1 ± 12.2<br>years for<br>intervention<br>group and<br>40.3 ± 10.4<br>for control<br>group | 96.3% were<br>women | 168 | 129 | 297 | An educational<br>program to<br>manage<br>challenging<br>behavior | A 3-day training course<br>(each session 2–5 h)<br>plus two 2.5 h follow-<br>up sessions after three<br>and six months | 6 months | Not<br>reported | No intervention                                       | Job satisfaction<br>was assessed using<br>the 6-item “Leiden<br>Quality of Work<br>Questionnaire for<br>Nurses” |  |                                                                                                                                                                                |                                                                                                                                                                 |
|                                 |             |                                                                  |                   |                   |                                                                                                          |                     |     |     |     |                                                                   |                                                                                                                        |          |                 |                                                       |                                                                                                                 |  | Job demands were<br>assessed using the<br>5-item “Leiden<br>Quality<br>of Work<br>Questionnaire”<br>Burnout                                                                    | Overall burnout,<br>emotional<br>exhaustion, and<br>depersonalisation<br>were lower in<br>intervention<br>group than                                            |
| Cascales-<br>Perez 2021<br>[68] | Spain       | Primary care<br>health<br>professionals                          | Individual<br>RCT | 8 weeks           | Mean age<br>52.4 ± 9.4<br>years for<br>intervention<br>group and<br>49.6 ± 9.7<br>years for              | 81% were<br>women   | 30  | 28  | 58  | A mindfulness-<br>based stress<br>reduction<br>intervention       | A 2.5-h weekly session<br>plus home exercises                                                                          | 8 weeks  | Not<br>reported | Received one<br>2.5-h theoretical<br>training session | The 22-item<br>Maslach Burnout<br>Index measured<br>emotional<br>exhaustion,                                    |  |                                                                                                                                                                                |                                                                                                                                                                 |





|                    |       |                                                                                            |                  |                                           |                                                                                                                                                                      |                                            |                               |                               |                               |                                                                                      |                                                                                                                           |                                       |                                                                              |                 |                                                                                                                                                                                                          |                                                                                                                                                                                                                                                                                                                                                                                                                                                                                                                                                                                                                                                                           |
|--------------------|-------|--------------------------------------------------------------------------------------------|------------------|-------------------------------------------|----------------------------------------------------------------------------------------------------------------------------------------------------------------------|--------------------------------------------|-------------------------------|-------------------------------|-------------------------------|--------------------------------------------------------------------------------------|---------------------------------------------------------------------------------------------------------------------------|---------------------------------------|------------------------------------------------------------------------------|-----------------|----------------------------------------------------------------------------------------------------------------------------------------------------------------------------------------------------------|---------------------------------------------------------------------------------------------------------------------------------------------------------------------------------------------------------------------------------------------------------------------------------------------------------------------------------------------------------------------------------------------------------------------------------------------------------------------------------------------------------------------------------------------------------------------------------------------------------------------------------------------------------------------------|
| Lebares 2021 [73]  | USA   | Resident physicians                                                                        | Individual y RCT | 50 weeks for RCT 1 and 32 weeks for RCT 2 | Mean age 27.4 ± 2.1 for intervention group and 28.6 ± 2.7 for control group in RCT 1 and 28.8 ± 2.4 for intervention group and 28.7 ± 2.2 for control group in RCT 2 | 50% of RCT 1 and 46.5% of RCT 2 were women | 22 for RCT 1 and 22 for RCT 2 | 18 for RCT 1 and 21 for RCT 2 | 40 for RCT 1 and 43 for RCT 2 | A tailored mindfulness-based cognitive training program                              | A 2-h weekly class in RCT 1 and a 1.5-h weekend retreat hike after week 4, and 20-min daily skills practice outside class | 8 weeks in RCT 1 and 6 weeks in RCT 2 | Outside work hours                                                           | No intervention | The 9-item Maslach Burnout Inventory-Human Service Survey was used for measuring burnout in RCT 1 and a validated 2 items measure was used to assess emotional exhaustion and depersonalization in RCT 2 | control only at 2-month follow-up but not at 6- or 12-month follow-ups The size of effect at 2-month was small (d = 0.29) Number of sickness absence days did not differ between intervention and control groups Burnout (emotional exhaustion and depersonalization) did not differ between intervention and control groups at 50-week follow-up in RCT 1 Emotional exhaustion (Cohen d = 0.81) and depersonalization (Cohen d = 0.69) were lower in intervention group than control group at 32-week follow-up in RCT 2 The intervention group had statistically significantly lower emotional exhaustion than control group at 3 months follow-up but not at 12 months |
| Montaner 2021 [87] | Spain | Healthcare professionals caring for dementia patients mostly nurses and nursing assistants | Individual y RCT | 3 and 12 months after intervention        | 19–64 years. Mean age 40.5 ± 12.8 for intervention group and 41.8 ± 12.3 for control group                                                                           | 93.3% were women                           | 51                            | 54                            | 105                           | Acceptance and Commitment Therapy intervention to increase psychological flexibility | Six 1.5-h sessions                                                                                                        | Not reported                          | The intervention was conducted in the work setting but outside of work hours | No intervention | The 22-item Maslach Burnout Index measured emotional exhaustion, depersonalization, and personal accomplishment                                                                                          |                                                                                                                                                                                                                                                                                                                                                                                                                                                                                                                                                                                                                                                                           |







|                                  |         |                                                                                                                        |                     |                                                   |                                                  |                     |    |    |    |                                                                                                                                                                                                                                                         |                                                                                        |          |                       |                                                                                  |                                                                                                                                                               |                                                                                                                                                      |                                                                                                                                                                                            |
|----------------------------------|---------|------------------------------------------------------------------------------------------------------------------------|---------------------|---------------------------------------------------|--------------------------------------------------|---------------------|----|----|----|---------------------------------------------------------------------------------------------------------------------------------------------------------------------------------------------------------------------------------------------------------|----------------------------------------------------------------------------------------|----------|-----------------------|----------------------------------------------------------------------------------|---------------------------------------------------------------------------------------------------------------------------------------------------------------|------------------------------------------------------------------------------------------------------------------------------------------------------|--------------------------------------------------------------------------------------------------------------------------------------------------------------------------------------------|
| Becker<br>2017,[28] 2020<br>[29] | Germany | Registered<br>nurses from<br>five hospitals<br>who had a<br>musculoskeletal<br>disorder at<br>the shoulder or<br>spine | Individual<br>y RCT | 22 weeks and<br>24 months                         | 24–61 years.<br>Mean age<br>43.8 ± 10.3<br>years | 86.8% were<br>women | 33 | 32 | 65 | A 1.5-h<br>psychoeducational<br>session, five bi-<br>weekly 1.5-h<br>work-related<br>psychosocial<br>coaching (based<br>on selection,<br>optimization, and<br>compensation<br>model) and a<br>weekly 45-min<br>session of<br>physiotherapy<br>exercises | One psychosocial<br>coaching every two<br>weeks and one<br>physiotherapy every<br>week | 10 weeks | Not<br>reported       | A weekly<br>session (45 min)<br>of<br>physiotherapy<br>exercises for 10<br>weeks | Current work<br>ability was<br>assessed using one<br>item of work<br>ability index                                                                            | Work ability was<br>assessed with<br>three items from<br>the German<br>version of work<br>ability index                                              | The intervention<br>improved work<br>ability with<br>respect to<br>physical demands<br>at 11 (d = 0.54)<br>and 22 (d = 0.59)<br>weeks after the<br>start of<br>intervention [28]           |
|                                  |         |                                                                                                                        |                     |                                                   |                                                  |                     |    |    |    |                                                                                                                                                                                                                                                         |                                                                                        |          |                       |                                                                                  | Emotional<br>exhaustion and<br>depersonalization<br>subscales of<br>burnout were each<br>measured using<br>three items of the<br>Maslach Burnout<br>Inventory | The intervention<br>had no effects on<br>current work<br>ability and work<br>ability with<br>respect to<br>psychological<br>demands.[28]             | The intervention<br>reduced<br>emotional<br>exhaustion (d =<br>0.52) during the<br>follow-up but had<br>no effect on<br>depersonalisation<br>[28]                                          |
|                                  |         |                                                                                                                        |                     |                                                   |                                                  |                     |    |    |    |                                                                                                                                                                                                                                                         |                                                                                        |          |                       |                                                                                  |                                                                                                                                                               |                                                                                                                                                      |                                                                                                                                                                                            |
| Chesak 2020<br>[99]              | USA     | Nurse leader<br>mothers                                                                                                | Individual<br>y RCT | Post-<br>intervention<br>and 3-month<br>follow-up | Not<br>reported                                  | Women<br>only       | 18 | 18 | 36 | An authentic<br>connections<br>groups program to<br>enhance resilience                                                                                                                                                                                  | An hour weekly<br>facilitated group<br>discussion                                      | 12 weeks | During<br>lunch break | An hour of free<br>time per week                                                 | Emotional<br>exhaustion and<br>personal<br>accomplishment<br>were measured<br>using the Maslach<br>Burnout Index                                              | Burnout                                                                                                                                              | At 24 months<br>follow-up among<br>24 participants in<br>intervention<br>group and 20 in<br>control group, the<br>intervention had<br>no effect on work<br>ability and well-<br>being [29] |
|                                  |         |                                                                                                                        |                     |                                                   |                                                  |                     |    |    |    |                                                                                                                                                                                                                                                         |                                                                                        |          |                       |                                                                                  |                                                                                                                                                               | Emotional<br>exhaustion and<br>personal<br>accomplishment<br>did not differ<br>between<br>intervention and<br>control groups at<br>post-intervention |                                                                                                                                                                                            |



|                       |             |                                                |                                      |                                                   |                                                                                                                                  |                                                                   |                                                              |     |     |                                                                                                                                              |                                                                                                  |                                                                      |              |                                   |                                                                                                                 |                                           |                                                                                                                |
|-----------------------|-------------|------------------------------------------------|--------------------------------------|---------------------------------------------------|----------------------------------------------------------------------------------------------------------------------------------|-------------------------------------------------------------------|--------------------------------------------------------------|-----|-----|----------------------------------------------------------------------------------------------------------------------------------------------|--------------------------------------------------------------------------------------------------|----------------------------------------------------------------------|--------------|-----------------------------------|-----------------------------------------------------------------------------------------------------------------|-------------------------------------------|----------------------------------------------------------------------------------------------------------------|
| Leontjevas 2020 [122] | Netherlands | Care staff of nursing homes                    | Cluster RCT (a stepped-wedge design) | 4, 12, and 20 months                              | Mean age 39.4 ± 11.9 years                                                                                                       | 96% were women                                                    | 796                                                          | 796 | 796 | A multidisciplinary care program for depression consisting of procedures for screening, identification, diagnosis, treatment, and monitoring | A 3-h training workshop and then implementation                                                  | For five groups the program was implemented in one group at the time | Workplace    | No intervention in control period | Job demands and job satisfaction                                                                                | Job demands were assessed by 8-item scale | Job demands and job satisfaction did not differ between intervention and control groups                        |
| McGonagle 2020 [82]   | USA         | Community and hospital primary care physicians | Individual RCT                       | 3 and 6 months                                    | Mean age 43.4 ± 8.8 for intervention group and 41.8 ± 7.4 for control group                                                      | 72.4% of intervention group and 86.2% of control group were women | 29                                                           | 30  | 59  | A positive psychology coaching                                                                                                               | One session every two weeks. First session lasted 60 min and five others lasted 30 min           | 3 months                                                             | Not reported | No intervention                   | The 22-item Maslach Burnout Index measured emotional exhaustion, depersonalization, and personal accomplishment | Work engagement and job satisfaction      | The intervention statistically significantly reduced burnout and improved work engagement and job satisfaction |
| Pehlivan 2020 [102]   | Turkey      | Oncology-haematology nurses                    | Cluster RCT                          | Post-intervention 3-, 6-, and 12-month follow-ups | Mean age 25.0 ± 5.1 years for 2-day intervention 27.8 ± 5.3 years for 5-week intervention and 27.2 ± 5.3 years for control group | 89.6% were women                                                  | N = 34 for 2-day intervention N = 49 for 5-week intervention | 42  | 125 | The compassion fatigue resiliency program                                                                                                    | One group received 5 h per day for 2 days. The second group received 2 h per week for five weeks | 5 weeks                                                              | Not reported | No intervention                   | Burnout was measured using the 30-item professional quality of life scale-IV                                    | Burnout                                   | Burnout did not differ between the groups                                                                      |

|                                   |             |                                   |                  |                                                     |                                                                             |                  |    |    |     |                                                                                                              |                                                                                                                                                                                       |           |                   |                                                                                                                                   |                                                                                                                            |                                                                                                                                                                                                                                                                                                                           |
|-----------------------------------|-------------|-----------------------------------|------------------|-----------------------------------------------------|-----------------------------------------------------------------------------|------------------|----|----|-----|--------------------------------------------------------------------------------------------------------------|---------------------------------------------------------------------------------------------------------------------------------------------------------------------------------------|-----------|-------------------|-----------------------------------------------------------------------------------------------------------------------------------|----------------------------------------------------------------------------------------------------------------------------|---------------------------------------------------------------------------------------------------------------------------------------------------------------------------------------------------------------------------------------------------------------------------------------------------------------------------|
| Ricou 2020 [98]                   | Switzerland | ICU nurses and nursing assistants | Individual y RCT | Post-intervention and 6 months after intervention   | 70% aged 40 years or younger and 30% were older than 40 years               | 79% were women   | 51 | 60 | 111 | A psychological intervention based on problem-based learning to boost personnel empowerment at the workplace | A weekly session                                                                                                                                                                      | 12 months | During work hours | No intervention                                                                                                                   | Burnout<br>The 22-item Maslach Burnout Index measured emotional exhaustion, depersonalization, and personal accomplishment | Overall burnout, emotional exhaustion, depersonalization, and personal accomplishment did not differ between intervention and control groups at post-intervention and 6-month follow-up<br>Job satisfaction at 6 months follow-up was higher in the intervention group than control group ( $p = 0.025$ ) [111]           |
| Sampson 2019 [112] and 2020 [111] | USA         | Newly licensed registered nurses  | Cluster RCT      | Post-intervention, 3 and 6 months post-intervention | Mean age 24.3 years for intervention group and 24.5 years for control group | 85.4% were women | 47 | 42 | 89  | A cognitive behavioral skill building program to improve physical and mental health                          | A 30–35 min weekly session                                                                                                                                                            | 8 weeks   | Workplace         | A 30–35 min weekly discussion about challenging events experienced in the past week as part of the normal nurse residency program | Job satisfaction<br>It was measured using the 7-item Job Satisfaction Scale                                                | However, job satisfaction did not differ between intervention and control group at post-intervention and three months follow-up[112]<br>Emotional exhaustion and personal accomplishment did not differ between the two groups, but depersonalisation was reduced more in yoga group than in fitness group ( $p = 0.05$ ) |
| Taylor 2020 [91]                  | Australia   | Junior physicians                 | Individual y RCT | 8 weeks                                             | 23–37 years. Mean age $30 \pm 4$ years                                      | 76% were women   | 11 | 10 | 21  | A personalised trauma-informed yoga intervention                                                             | An hour private yoga per week plus a 4-h workshop/retreat, audio-guided breathing and relaxation, and 2 eHealth video classes.<br>The participants were encouraged to do 2 h homework | 8 weeks   | Not reported      | At least one 45–60 min group interval and/or Boxfit fitness per week.<br>The participants were encouraged to do 2.5 h homework    | Burnout<br>Burnout was measured using the 22-item Maslach Burnout Inventory                                                | Emotional exhaustion did not significantly reduce in both groups, but personal                                                                                                                                                                                                                                            |



|                  |          |                                                                                                   |                |                                                      |                                                                                   |                  |     |     |      |                                                                                                         |                                                              |          |                    |                                                     |                  |                                                                                   |                                                                                                                                                                                                |                                                                                                                                                                                   |
|------------------|----------|---------------------------------------------------------------------------------------------------|----------------|------------------------------------------------------|-----------------------------------------------------------------------------------|------------------|-----|-----|------|---------------------------------------------------------------------------------------------------------|--------------------------------------------------------------|----------|--------------------|-----------------------------------------------------|------------------|-----------------------------------------------------------------------------------|------------------------------------------------------------------------------------------------------------------------------------------------------------------------------------------------|-----------------------------------------------------------------------------------------------------------------------------------------------------------------------------------|
| Wong 2020 [120]  | Malaysia | Healthcare professional                                                                           | Cluster RCT    | 17 months                                            | Mean age 33.4 ± 7.7 years for intervention group and 33.3 ± 7.5 for control group | 83% were women   | 544 | 498 | 1042 | Supervised yoga                                                                                         | Sessions with handouts and home practice                     | 8 weeks  | Workplace          | No intervention                                     | Job satisfaction | It was measured using the 6-item scale                                            | The intervention had no effect on overall job satisfaction                                                                                                                                     | accomplishment significantly increased in both groups                                                                                                                             |
| Xie 2020 [59]    | China    | ICU nurses with burnout                                                                           | Cluster RCT    | Post-intervention, 1 and 3 months post-intervention  | Mean age 27.7 ± 7.7                                                               | Women only       | 45  | 46  | 91   | Mindfulness-based intervention                                                                          | A 2.5-h weekly course plus homework practices                | 8 weeks  | Outside work hours | Two 1.5-h educational sessions in week 1 and week 4 | Burnout          | It was measured using the 22-item Maslach Burnout Inventory                       | Emotional exhaustion and depersonalization were significantly lower and personal accomplishment was significantly higher in intervention group than control group at 1- and 3-month follow-ups | Emotional exhaustion was lower in intervention group than control group, but depersonalization and personal accomplishment did not differ between intervention and control groups |
| Dunne 2019 [86]  | Ireland  | Emergency department healthcare professionals                                                     | Individual RCT | 2 months (one week after completion of intervention) | Older than 18 years                                                               | Not reported     | 17  | 25  | 42   | An attention-based training intervention                                                                | Four sessions (4 h/session) plus 20 min practice twice a day | 7 weeks  | Not reported       | No intervention                                     | Burnout          | It was measured using the 22-item Maslach Burnout Inventory                       | control group, but depersonalization and personal accomplishment did not differ between intervention and control groups                                                                        |                                                                                                                                                                                   |
| Fukui 2019 [127] | Japan    | Health and social care professionals (home care nurses, care managers, and heads of care workers) | Cluster RCT    | 7 months                                             | Mean age 47.1 ± 8.6 years                                                         | 95.3% were women | 156 | 135 | 291  | A multidisciplinary end-of-life educational intervention consisting of two educational workshops and an | Two 3-h programs                                             | 7 months | Not reported       | No intervention                                     | Job satisfaction | It was assessed using the 20-item short-form Minnesota Satisfaction Questionnaire | Job satisfaction did not differ between intervention and control groups                                                                                                                        |                                                                                                                                                                                   |

|                    |                 |                                                  |                |                                                                          |                                                                                                                                                                              |                  |    |    |     |                                                                                                                                                       |                                     |               |                                             |                 |                                                                                                                                                                                                                                                                                             |                                                                                                                   |
|--------------------|-----------------|--------------------------------------------------|----------------|--------------------------------------------------------------------------|------------------------------------------------------------------------------------------------------------------------------------------------------------------------------|------------------|----|----|-----|-------------------------------------------------------------------------------------------------------------------------------------------------------|-------------------------------------|---------------|---------------------------------------------|-----------------|---------------------------------------------------------------------------------------------------------------------------------------------------------------------------------------------------------------------------------------------------------------------------------------------|-------------------------------------------------------------------------------------------------------------------|
| Kloos 2019 [49]    | The Netherlands | Nursing home staff                               | Cluster RCT    | 12 weeks                                                                 | 16–65 years. Mean age 41.8 ± 12.1 years                                                                                                                                      | 95% were women   | 79 | 49 | 128 | educational booklet<br><br>An online multi-component positive psychology intervention consisting of psychoeducation and positive psychology exercises | One module per week (eight modules) | 8 to 12 weeks | A mandatory course with 9 h of work payment | No intervention | General well-being, work engagement and job satisfaction<br><br>General well-being was assessed by the Mental Health Continuum-Short Form<br><br>Work engagement was assessed by the 9-item short version of the Utrecht Work Engagement Scale                                              | The intervention had no effects on general well-being, work engagement and job satisfaction                       |
| Lebares 2019 [70]  | USA             | First-year surgery residents                     | Individual RCT | Post-intervention (3.5 months after baseline), and 1-year after baseline | Mean age 29.0 ± 2.4 years for intervention group and 27.4 ± 2.1 for control group<br>Mean age 32.9 ± 7.5 years for intervention group and 30.2 ± 6.1 years for control group | 38.1% were women | 12 | 9  | 21  | A mindfulness-based cognitive training                                                                                                                | A 2-h weekly session                | 8 weeks       | Not reported                                | No intervention | Burnout<br><br>It was measured using the 12-item abbreviated Maslach Burnout Inventory                                                                                                                                                                                                      | Burnout did not differ between intervention and control groups at post-intervention and 1-year follow-up          |
| Lin 2019 [118]     | China           | Nurses from two tertiary-level general hospitals | Individual RCT | Post-intervention and 3 months follow-up                                 | Mean age 37.9 ± 13.2 years                                                                                                                                                   | 86% were women   | 37 | 34 | 71  | Acceptance and commitment therapy                                                                                                                     | A 2.5-h weekly session              | 2 weeks       | Not reported                                | No intervention | Job satisfaction was assessed using five items from the Maastricht Job Satisfaction Scale<br><br>Burnout<br><br>It was measured using the 12-item abbreviated Maslach Burnout Inventory<br><br>Nurses' job satisfaction was assessed using the 31-item McCloskey/Mueller Satisfaction Scale | Job satisfaction did not differ between intervention and control group at post-intervention and 3-month follow-up |
| O'Brien 2019 [132] | USA             | Nurses and nursing aides                         | Individual RCT | One month after completion of intervention                               | Mean age 37.9 ± 13.2 years                                                                                                                                                   | 86% were women   | 37 | 34 | 71  | Acceptance and commitment therapy                                                                                                                     | A 2.5-h weekly session              | 2 weeks       | Not reported                                | No intervention | Work-based injuries and sickness absence due to injury                                                                                                                                                                                                                                      | Intervention group reported fewer days missed from work due to injury than control group ( $p =$                  |



and 7.6%  
aged 41  
years or  
older

stressors and  
stressful situations  
at workplace

health, and job  
satisfaction

at 6-month  
follow-up was  
lower in  
intervention  
group than  
control group  
(13% vs. 67%,  $p < 0.001$ ). The effect  
sustained at 12  
months follow-up  
(37% vs. 72%,  $p < 0.001$ )

Work-related job  
strain was  
measured using  
the 26-item Job  
Content  
Questionnaire

Burnout at work  
and general health  
was assessed using  
some items from  
the 46-item  
Copenhagen  
Psychosocial  
Questionnaire

Prevalence of  
isostrain (job  
strain and low  
social support) at  
6-month follow-  
up was lower in  
intervention  
group than  
control group (7%  
vs. 55%,  $p < 0.001$ ). The effect  
sustained at 12  
months follow-up  
(14% vs. 67%,  $p < 0.001$ )

Job satisfaction  
was assessed using  
a single item scale  
(0 to 10)

Decrease in  
psychological  
demand at 6  
months was  
larger in  
intervention  
group than  
control group  
(-5.5 vs. -0.7,  $p < 0.001$ )

Increase in  
decision latitude  
at 6 months was  
larger in  
intervention  
group than  
control group  
(18.4 vs. -5.1,  $p < 0.001$ )

|                      |         |                               |                |                                                            |                                                                                                                                  |                |    |    |     |                                                                                                          |                                                                                             |         |                  |                 |                                                                                                             |                                                                                                               |                                                                                                                         |
|----------------------|---------|-------------------------------|----------------|------------------------------------------------------------|----------------------------------------------------------------------------------------------------------------------------------|----------------|----|----|-----|----------------------------------------------------------------------------------------------------------|---------------------------------------------------------------------------------------------|---------|------------------|-----------------|-------------------------------------------------------------------------------------------------------------|---------------------------------------------------------------------------------------------------------------|-------------------------------------------------------------------------------------------------------------------------|
| Maatouk 2018<br>[37] | Germany | Nurses aged 45 years or older | Individual RCT | After booster session (13 weeks after baseline assessment) | 45 years or older. Mean age 51.6 ± 4.7 for intervention group and 52.6 ± 5.6 for control group                                   | 87% were women | 52 | 55 | 107 | A small-group intervention for the promotion of mental health according to a theory of successful ageing | A 2-h weekly session and a booster session 6 weeks after completion of the first 7 sessions | 7 weeks | During work time | No intervention | Well-being, work ability, and job control<br><br>Well-being was measured using the 5-item WHO questionnaire | Well-being, work ability, and job control did not differ between intervention and control groups at follow-up | Increase in social support at 6 months was larger in intervention group than control group (2.0 vs. -2.6, $p < 0.001$ ) |
|                      |         |                               |                |                                                            | Symptoms of burnout at 6-month follow-up were less common in intervention group than control group (87.4 vs. 51.2, $p = 0.001$ ) |                |    |    |     |                                                                                                          |                                                                                             |         |                  |                 |                                                                                                             |                                                                                                               |                                                                                                                         |
|                      |         |                               |                |                                                            | Job satisfaction at 6 months was higher in intervention group than control group (82.5 vs. 54.9, $p < 0.001$ )                   |                |    |    |     |                                                                                                          |                                                                                             |         |                  |                 |                                                                                                             |                                                                                                               |                                                                                                                         |
|                      |         |                               |                |                                                            | Self-rated general health at 6 months was higher in intervention group than control group (88.8 vs. 80.2, $p = 0.01$ )           |                |    |    |     |                                                                                                          |                                                                                             |         |                  |                 |                                                                                                             |                                                                                                               |                                                                                                                         |



|                     |         |                                                              |                   |                                |                                        |                | delivered group                                                                                      |    |     |                                                                                         | happiness/positivity, energy/focus, and productivity)                                                                                                                                     |          |                                 |                 |                                                             | Burnout was measured by Maslach Burnout Inventory                                                                                                                                                                         | mindfulness resilience training group. The intervention did not improve depersonalization and personal accomplishment subscales of burnout |
|---------------------|---------|--------------------------------------------------------------|-------------------|--------------------------------|----------------------------------------|----------------|------------------------------------------------------------------------------------------------------|----|-----|-----------------------------------------------------------------------------------------|-------------------------------------------------------------------------------------------------------------------------------------------------------------------------------------------|----------|---------------------------------|-----------------|-------------------------------------------------------------|---------------------------------------------------------------------------------------------------------------------------------------------------------------------------------------------------------------------------|--------------------------------------------------------------------------------------------------------------------------------------------|
| Schroeder 2018 [60] | USA     | Primary care physicians                                      | Individuall y RCT | Post-intervention and 3 months | 32–61 years. Mean age 42.8 ± 8.4 years | 73% were women | 17                                                                                                   | 16 | 33  | A brief mindfulness-based intervention                                                  | 13-h training, 2-h follow-up sessions 2 and 4 weeks after training                                                                                                                        | 4 weeks  | Weekend                         | No intervention | It was measured using the 22-item Maslach Burnout Inventory | Only well-being improved in smartphone group                                                                                                                                                                              |                                                                                                                                            |
|                     |         |                                                              |                   |                                |                                        |                |                                                                                                      |    |     |                                                                                         |                                                                                                                                                                                           |          |                                 |                 |                                                             | However, emotional well-being and emotional exhaustion did not differ between in-person mindfulness, smartphone, and control groups                                                                                       |                                                                                                                                            |
|                     |         |                                                              |                   |                                |                                        |                |                                                                                                      |    |     |                                                                                         |                                                                                                                                                                                           |          |                                 |                 |                                                             | The intervention reduced emotional exhaustion and depersonalization at 3 months follow-up                                                                                                                                 |                                                                                                                                            |
| Suni 2018 [130]     | Finland | Healthcare workers with recurrent non-specific low back pain | Individuall y RCT | 6 and 12 months                | 30–55 years, mean age 46.4 ± 6.8 years | Women          | Exercise group (N = 57), counselling group (N = 55) and both exercise and counselling group (N = 53) | 54 | 219 | Neuromuscular exercise (to enhance stability of the spine) and/or back care counselling | An hour exercise session, twice a week (a total of 48 sessions)<br><br>A 45-min session of counselling, once a week in 1st month and every third week after that (a total of 10 sessions) | 24 weeks | On weekdays near the workplaces | No intervention | Sickness absence days                                       | Mean sickness absence days during the first 6 months was 0.86 for exercise group, 0.97 for counselling group, 0.13 for combined exercise and counselling, and 1.56 days for control group. The differences between groups |                                                                                                                                            |

|                   |                 |                     |                 |          |                           |                |    |    |     |                                                                                                                                                                                   |                                                   |         |                                                           |                 |                                                                                                                                                      |                                                                                                                                                                                                                              |                                                                                                                                                                                                                                                                                                                                                                                                                                                                  |
|-------------------|-----------------|---------------------|-----------------|----------|---------------------------|----------------|----|----|-----|-----------------------------------------------------------------------------------------------------------------------------------------------------------------------------------|---------------------------------------------------|---------|-----------------------------------------------------------|-----------------|------------------------------------------------------------------------------------------------------------------------------------------------------|------------------------------------------------------------------------------------------------------------------------------------------------------------------------------------------------------------------------------|------------------------------------------------------------------------------------------------------------------------------------------------------------------------------------------------------------------------------------------------------------------------------------------------------------------------------------------------------------------------------------------------------------------------------------------------------------------|
| Verweij 2018 [66] | The Netherlands | Resident physicians | Individualy RCT | 3 months | Mean age 31.2 ± 4.6 years | 88% were women | 71 | 67 | 138 | Mindfulness-based stress reduction including psychoeducation and exercises (body scan, yoga, and sitting/walking).<br><br>They were instructed to practice 45 min per day at home | One 2.5-h session per week and one 6-h silent day | 8 weeks | Sessions in the evening and silent day during the weekend | No intervention | Burnout<br><br>Emotional exhaustion and depersonalization subscales of burnout were each measured using three items of the Maslach Burnout Inventory | Emotional exhaustion (between-group mean difference 0.09, 95% CI -1.73 to 1.92, $p = 0.92$ ) and depersonalization (between-group mean difference 0.17, 95% CI -0.74 to 1.08, $p = 0.71$ ) did not differ between two groups | were not significant ( $p = 0.60$ )<br><br>Mean sickness absence days for 12 months follow-up was 4.17 days for exercise group, 2.30 for counselling group, 0.15 for combined exercise and counselling group, and 2.29 days for control group. The differences between groups were significant ( $p = 0.025$ )<br><br>Reduced personal accomplishment was lower in the intervention group than control group at follow-up (-1.19 (-0.13 to -2.25, $p = 0.028$ ). |
| Calisi 2017 [47]  | USA             | Registered cardiac  | Individualy RCT | 8 weeks  | 27–60 years               | Women          | 24 | 22 | 46  | Relaxation response, a                                                                                                                                                            | A 45-min session. Intervention group was          | 8 weeks | Workplace                                                 | No intervention | Well-being                                                                                                                                           | Post-intervention well-being did                                                                                                                                                                                             |                                                                                                                                                                                                                                                                                                                                                                                                                                                                  |



|                    |             |                                                                                    |                   |                                             |                                                                                        |                                                               |    |    |     |                                                                                       |                                                      |          |                   |                                                             |                                                                                                                   |                                                                                                                                                 |                                                    |
|--------------------|-------------|------------------------------------------------------------------------------------|-------------------|---------------------------------------------|----------------------------------------------------------------------------------------|---------------------------------------------------------------|----|----|-----|---------------------------------------------------------------------------------------|------------------------------------------------------|----------|-------------------|-------------------------------------------------------------|-------------------------------------------------------------------------------------------------------------------|-------------------------------------------------------------------------------------------------------------------------------------------------|----------------------------------------------------|
|                    |             | nurses                                                                             |                   |                                             |                                                                                        |                                                               |    |    |     | diaphragmatic breathing practice, and a repetitive mental focus                       | encouraged to practice for 10–20 min, twice a day    |          |                   |                                                             |                                                                                                                   | It was measured with single item (score 0 to 7)                                                                                                 | not differ between intervention and control groups |
| Ireland 2017 [65]  | Australia   | Intern doctors working at emergency department of in a hospital                    | Individuall y RCT | 5 and 10 weeks                              | 22–48 years. mean age 26.9 ± 4.8                                                       | 64% were women                                                | 23 | 21 | 44  | Mindfulness program including education and exercises                                 | 1-h weekly training workshop                         | 10 weeks | Workplace         | An hour extra break per week                                | Burnout was measured with the 19-item Copenhagen Burnout Inventory                                                | Burnout marginally improved in the intervention group ( <i>p</i> = 0.072)                                                                       |                                                    |
| Mache 2017 [78]    | Germany     | Junior physicians working in Gynecology and Obstetrics Medicine of seven hospitals | Individuall y RCT | Post-intervention, 3- and 6-month follow-up | Mean age 27.1 ± 2.1 years for intervention group and 27.8 ± 2.2 years for control grou | 69.2% were women                                              | 38 | 40 | 78  | Coping skill training consisting of problem solving and emotion regulation strategies | A 1.5-h weekly session                               | 3 months | During work hours | No intervention                                             | Emotional exhaustion was measured using the 5-item Maslach Burnout Inventory                                      | Emotional exhaustion was lower in intervention group than control group at post-intervention, 3- and 6-month follow-ups ( <i>p</i> < 0.01, all) |                                                    |
| van Dijk 2017 [43] | Netherlands | First-year clinical clerkship medical students                                     | Cluster RCT       | 3, 7, 12, 15, and 20 months                 | Median age and SD 23.7 ± 1.91 for intervention group and 23.3 ± 1.77 for control group | 72% of intervention group and 85% of control group were women | 83 | 84 | 167 | A mindfulness-based stress reduction intervention                                     | A 2-h weekly session plus home practices             | 8 weeks  | Outside work hour | No intervention                                             | Emotional, psychological, and social well-being was assessed using the 14-item Mental Health Continuum-Short Form | The intervention improved mental well-being ( <i>p</i> = 0.002, Cohen's <i>d</i> = 0.44) during the 20-month follow-up                          |                                                    |
| Wei 2017 [85]      | China       | Emergency departments nurses of 3 hospitals                                        | Individuall y RCT | 6 months                                    | 20–48 years. 80% were younger than 35 years.                                           | 86.3% were women                                              | 51 | 51 | 102 | Regular and comprehensive management.                                                 | A 30-min session twice a week for regular management | 6 months | Workplace         | Regular management consisted of discussions about stressful | Burnout A job burnout was measured by the 15-item revised                                                         | The intervention statistically significantly reduced emotional                                                                                  |                                                    |



|                     |         |                                                                         |                                      |          |                                                                                                 |                  |     |     |     |                                                                                                                                                            |                                                                                                                            |          |                                            |                                   |                                                                                                                                                                                                                                                                                                      |                                                                                                                                                                                                                                                                                           |
|---------------------|---------|-------------------------------------------------------------------------|--------------------------------------|----------|-------------------------------------------------------------------------------------------------|------------------|-----|-----|-----|------------------------------------------------------------------------------------------------------------------------------------------------------------|----------------------------------------------------------------------------------------------------------------------------|----------|--------------------------------------------|-----------------------------------|------------------------------------------------------------------------------------------------------------------------------------------------------------------------------------------------------------------------------------------------------------------------------------------------------|-------------------------------------------------------------------------------------------------------------------------------------------------------------------------------------------------------------------------------------------------------------------------------------------|
| Hersch 2016 [116]   | USA     | Nurses from six hospitals                                               | Individual y RCT                     | 3 months | 22–65 years. Mean age 41 years                                                                  | 87.5% were women | 52  | 52  | 104 | A web-based stress management intervention consisting of 7 modules for nurses and an additional module for nurse managers                                  | To use as often as possible                                                                                                | 3 months | Access the program on work time or at home | No intervention                   | Job satisfaction and workload<br>It was measured using the 24-item Nurse Satisfaction Scale<br>A subscale of Nursing Stress Scale was used to assess workload                                                                                                                                        | Workload reduced in intervention group compared with control group ( $p = 0.022$ )<br>Job satisfaction did not differ between intervention and control groups                                                                                                                             |
| Kubota 2016 [93]    | Japan   | Oncology nurses                                                         | Individual y RCT                     | 3 months | Mean age $38.9 \pm 5.4$ years for intervention group and $40.0 \pm 5.4$ years for control group | 96% were women   | 50  | 46  | 96  | A psycho-oncology training consisting of supportive communication, and a crisis intervention approach to address psychological problems in cancer patients | Two 8-h meetings with one week interval                                                                                    | 2 weeks  | Not reported                               | No intervention                   | Burnout<br>Emotional exhaustion, depersonalization, and personal accomplishment were measured using the 22-item Maslach Burnout Inventory                                                                                                                                                            | Emotional exhaustion, depersonalization, and personal accomplishment did not differ between intervention and control groups                                                                                                                                                               |
| Rasmussen 2016 [33] | Denmark | Elderly care personnel (89% were nurses' aides and 11% service workers) | Cluster RCT (a stepped-wedge design) | 12 weeks | 18–65 years. Mean age 47 years                                                                  | 93% were women   | 586 | 586 | 586 | A multi-faceted intervention consisting of integrated physical training, participatory ergonomics, and cognitive behavioural training                      | 12 sessions of physical training, 5 sessions of participatory ergonomics, and 2 sessions of cognitive behavioural training | 12 weeks | During work hours                          | No intervention in control period | Current work ability, sickness absence, physical exertion, and occupational lifting<br>Current work ability was assessed using one item of work ability index<br>Self-reported sickness absence days due to low back pain<br>Physical exertion was measured using a single item of Borg's Cr10-scale | Intervention reduced occupational lifting (difference $-0.35$ , 95% CI $-0.61$ to $-0.08$ , $p = 0.01$ ) and marginally improved work ability (difference $-0.24$ , 95% CI $-0.49$ to $0.01$ , $p = 0.06$ )<br>The intervention had no effects on sickness absence, and physical exertion |

|                      |       |                                        |                  |                                                                              |                                                                               |                  |      |      |    |                                                                                |                                                                                                                                                                                                                                      |          |                   |                 |                                                                                                                                               |                                                                                                                                                                                                                                                                                                          |
|----------------------|-------|----------------------------------------|------------------|------------------------------------------------------------------------------|-------------------------------------------------------------------------------|------------------|------|------|----|--------------------------------------------------------------------------------|--------------------------------------------------------------------------------------------------------------------------------------------------------------------------------------------------------------------------------------|----------|-------------------|-----------------|-----------------------------------------------------------------------------------------------------------------------------------------------|----------------------------------------------------------------------------------------------------------------------------------------------------------------------------------------------------------------------------------------------------------------------------------------------------------|
| Ripp 2016 [95]       | USA   | First-year internal medicine residents | Individual y RCT | 12 months                                                                    | Not reported                                                                  | Not reported     | 21   | 17   | 38 | Facilitated group discussion intervention                                      | Two 1-h sessions monthly (total 18 sessions)                                                                                                                                                                                         | 9 months | Workplace         | No intervention | Occupational lifting was assessed using a single item<br>Burnout                                                                              | Burnout at follow-up did not differ between intervention and control groups                                                                                                                                                                                                                              |
| Steinberg 2016 [107] | USA   | Surgical intensive care unit personnel | Individual y RCT | 1 week after completion of intervention (2 months after baseline assessment) | Mean age 44.0 ± 12.1 for intervention group and 44.1 ± 10.9 for control group | 88% were women   | 16 ? | 16 ? | 32 | Mindfulness-based intervention consisting of meditation, light yoga, and music | An hour per week                                                                                                                                                                                                                     | 8 weeks  | During work hours | No intervention | Work engagement was measured using the 9-item Utrecht Work Engagement Scale                                                                   | Work engagement increased during the follow-up in intervention group ( $p = 0.006$ ) but did not change in control group ( $p = 0.30$ )                                                                                                                                                                  |
| Alexander 2015 [84]  | USA   | Nurses                                 | Individual y RCT | 8 weeks                                                                      | Mean age 46.4 ± 10.2                                                          | 97.5% were women | 20   | 20   | 40 | Supervised yoga                                                                | Sessions with handouts and home practices                                                                                                                                                                                            | 8 weeks  | Workplace         | No intervention | Emotional exhaustion, depersonalization, and personal accomplishment were measured using the 22-item Maslach Burnout Inventor                 | Emotional exhaustion and depersonalization statistically improved in intervention group than control group                                                                                                                                                                                               |
| Amutio 2015 [67]     | Spain | Physicians                             | Individual y RCT | 8 weeks and 12 months                                                        | Mean age 47.3 ± 9.4                                                           | 57.1% were women | 21   | 21   | 42 | A mindfulness-based stress reduction intervention                              | A 2.5-h weekly session plus one 8-h retreat session. The intervention group was instructed to practice exercises for 45 min per day.<br><br>4 weeks after end of intervention phase, a 2.5-h monthly session continued for 10 months | 8 weeks  | Outside work      | No intervention | Burnout<br><br>Emotional exhaustion, depersonalization, and personal accomplishment were measured using the 22-item Maslach Burnout Inventory | Yoga had no effect on personal accomplishment<br>The intervention reduced overall burnout ( $p = 0.02$ ) and emotional exhaustion ( $p = 0.05$ ) at 8-weeks post-intervention but had no effects on depersonalization and personal accomplishment<br><br>The intervention effect on emotional exhaustion |

|                       |         |                                                                                               |                  |          |                                                                                            |                  |     |    |     |                                                                                                                                                                                                                                                                                               |                                                                |          |                   |                                                                                                                                                                                                                  |                                                                                                                                               |                                                                                                                                                                                                                                                     |                                                                                                                                                                                                                          |
|-----------------------|---------|-----------------------------------------------------------------------------------------------|------------------|----------|--------------------------------------------------------------------------------------------|------------------|-----|----|-----|-----------------------------------------------------------------------------------------------------------------------------------------------------------------------------------------------------------------------------------------------------------------------------------------------|----------------------------------------------------------------|----------|-------------------|------------------------------------------------------------------------------------------------------------------------------------------------------------------------------------------------------------------|-----------------------------------------------------------------------------------------------------------------------------------------------|-----------------------------------------------------------------------------------------------------------------------------------------------------------------------------------------------------------------------------------------------------|--------------------------------------------------------------------------------------------------------------------------------------------------------------------------------------------------------------------------|
| Andersen 2015 [31]    | Denmark | Healthcare workers with a history of work-related back or upper body musculoskeletal problems | Individual y RCT | 3 months | Mean age 45.1 years for intervention group and 47.1 years for control group                | 94.4% were women | 27  | 27 | 54  | Tailored aerobic fitness and strength exercises                                                                                                                                                                                                                                               | A 1.5 h health education and 50 min exercises 3 times per week | 10 weeks | During work hours | A 1.5 h health education                                                                                                                                                                                         | Self-reported number of sickness absence days due to musculoskeletal disorders                                                                | Current work ability and sickness absence                                                                                                                                                                                                           | sustained at 12 months follow-up                                                                                                                                                                                         |
|                       |         |                                                                                               |                  |          |                                                                                            |                  |     |    |     |                                                                                                                                                                                                                                                                                               |                                                                |          |                   |                                                                                                                                                                                                                  | Current work ability was assessed using one item of work ability index                                                                        | Current work ability improved in intervention group compared with control group ( $p = 0.04$ )                                                                                                                                                      | Sickness absence days during the past three months did not differ between intervention and control groups                                                                                                                |
| Jakobsen 2015 [27,40] | Denmark | Healthcare workers from 18 departments of three hospitals                                     | Cluster RCT      | 10 weeks | 18–67 years. Mean age $44 \pm 10$ for control group and $40 \pm 12$ for intervention group | Women            | 111 | 89 | 200 | Supervised high-intensity strength exercises plus five group coaching for 30–45 min to motivate workers to take part in the training and to begin and maintain healthy lifestyles. They were also offered courses (each 1.5–3 h) on ergonomics, patient handling and use of assistive devices | 10 min 5 times per week                                        | 10 weeks | Workplace         | They received training equipment and posters demonstrating exercises and performed exercises at home. They were also offered courses (each 1.5–3 h) on ergonomics, patient handling and use of assistive devices | Change in work ability index measured with 7 items [27] and perceived change in well-being and job satisfaction during 10-week follow-up [40] | During follow-up, work ability index did not change in the intervention group but decreased in the control group [27]. Work ability was higher in the intervention group compared with the control group (Cohen's $d$ 0.24, 95% CI 0.20, 0.50) [27] | 51% of intervention group and 7% of control group reported improvement in well-being ( $p < 0.001$ ) and 32% of intervention group and 5% of control group reported improvement in job satisfaction ( $p < 0.001$ ) [40] |

|                      |         |                                                                      |                     |                   |                                                                                                        |                     |    |    |     |                                                                                                                                                                                 |                                                             |                     |                      |                 |                                                                                                                                                                                                                                                |                                                                                                                                                                                               |
|----------------------|---------|----------------------------------------------------------------------|---------------------|-------------------|--------------------------------------------------------------------------------------------------------|---------------------|----|----|-----|---------------------------------------------------------------------------------------------------------------------------------------------------------------------------------|-------------------------------------------------------------|---------------------|----------------------|-----------------|------------------------------------------------------------------------------------------------------------------------------------------------------------------------------------------------------------------------------------------------|-----------------------------------------------------------------------------------------------------------------------------------------------------------------------------------------------|
| Linzer 2015<br>[74]  | USA     | Primary care<br>clinicians                                           | Cluster<br>RCT      | 12–18 months      | Mean age<br>48.3 ± 8.9<br>for<br>intervention<br>group and<br>46.4 ± 9.4<br>for control<br>group       | 51.8% were<br>women | 83 | 83 | 166 | Improvements in<br>work<br>conditions<br>(communication,<br>workflow, and<br>quality)                                                                                           | Through a variety of<br>methods during follow-<br>up period | During<br>follow-up | Workplace            | No intervention | Burnout and Job<br>satisfaction                                                                                                                                                                                                                | During follow-up,<br>burnout<br>improved in<br>21.8% of<br>intervention<br>group and in 7.1%<br>of control group<br>( $p = 0.01$ )                                                            |
|                      |         |                                                                      |                     |                   |                                                                                                        |                     |    |    |     |                                                                                                                                                                                 |                                                             |                     |                      |                 | It was measured<br>with a 5-item scale,<br>focusing primarily<br>on emotional<br>exhaustion and<br>burnout was<br>defined as a score<br>of 3 or higher.                                                                                        | During follow-up,<br>job satisfaction<br>increased in<br>23.1% of<br>intervention<br>group and in<br>10.0% of control<br>group ( $p = 0.04$ )                                                 |
|                      |         |                                                                      |                     |                   |                                                                                                        |                     |    |    |     |                                                                                                                                                                                 |                                                             |                     |                      |                 | Job satisfaction<br>was assessed with<br>a questionnaire                                                                                                                                                                                       |                                                                                                                                                                                               |
|                      |         |                                                                      |                     |                   |                                                                                                        |                     |    |    |     |                                                                                                                                                                                 |                                                             |                     |                      |                 | Job satisfaction                                                                                                                                                                                                                               |                                                                                                                                                                                               |
| Mache 2015<br>[121]  | Germany | Medical<br>specialists in<br>their first year<br>after<br>graduation | Individual<br>y RCT | 3 and 6<br>months | Mean age<br>28 years                                                                                   | 60% were<br>women   | 42 | 43 | 85  | A psychosocial<br>intervention<br>consisting of<br>resilience training,<br>and cognitive<br>behavioral and<br>solution-focused<br>counselling                                   | A 2-h weekly session                                        | 12 weeks            | Workplace            | No intervention | Job satisfaction<br>was assessed using<br>the 4-item of the<br>Copenhagen<br>Psychosocial<br>Questionnaire                                                                                                                                     | Job satisfaction<br>did not differ<br>between<br>intervention and<br>control groups                                                                                                           |
|                      |         |                                                                      |                     |                   |                                                                                                        |                     |    |    |     |                                                                                                                                                                                 |                                                             |                     |                      |                 |                                                                                                                                                                                                                                                | In intention-to-<br>treat analysis, the<br>intervention<br>improved mental<br>well-being ( $p =$<br>0.046) but did not<br>improve job<br>control or<br>perceived work<br>ability              |
|                      |         |                                                                      |                     |                   |                                                                                                        |                     |    |    |     |                                                                                                                                                                                 |                                                             |                     |                      |                 |                                                                                                                                                                                                                                                |                                                                                                                                                                                               |
|                      |         |                                                                      |                     |                   |                                                                                                        |                     |    |    |     |                                                                                                                                                                                 |                                                             |                     |                      |                 |                                                                                                                                                                                                                                                |                                                                                                                                                                                               |
| Müller 2015<br>[36]  | Germany | Registered<br>nurses of a<br>community<br>hospital                   | Individual<br>y RCT | 12 months?        | Mean age<br>44.7 ± 9.3<br>years for<br>intervention<br>group and<br>42.7 ± 9.9<br>for control<br>group | 94% were<br>women   | 36 | 34 | 70  | Training based on<br>a life-management<br>strategy of<br>selection,<br>optimization, and<br>compensation<br>model to cope<br>with job demand<br>or to increase job<br>resources | 6 sessions (16.5 h)                                         | 9 months            | Workplace            | No intervention | Mental well-being<br>was assessed with<br>WHO well-being<br>index perceived<br>work ability was<br>assessed with<br>three items of the<br>German<br>version of work<br>ability index, and<br>job control was<br>assessed by a 9-<br>item scale | The intervention<br>was effective in<br>improving mental<br>well-being only in<br>those with low<br>job control at<br>baseline ( $p <$<br>0.001) but not in<br>those with high<br>job control |
|                      |         |                                                                      |                     |                   |                                                                                                        |                     |    |    |     |                                                                                                                                                                                 |                                                             |                     |                      |                 |                                                                                                                                                                                                                                                |                                                                                                                                                                                               |
|                      |         |                                                                      |                     |                   |                                                                                                        |                     |    |    |     |                                                                                                                                                                                 |                                                             |                     |                      |                 |                                                                                                                                                                                                                                                |                                                                                                                                                                                               |
| Roussel 2015<br>[55] | Belgium | Hospital<br>healthcare<br>workers with                               | Individual<br>y RCT | 6 months          | 18–65 years.<br>Mean age<br>41.4 years                                                                 | 82.6% were<br>women | 31 | 38 | 69  | A<br>multidisciplinary<br>program                                                                                                                                               | 10 group sessions and 5<br>individual sessions.             | 3 months            | During<br>work hours | No intervention | General health, job<br>satisfaction, and<br>sickness absence                                                                                                                                                                                   | General health,<br>job satisfaction,<br>and sickness                                                                                                                                          |

|                              |        |                                                               |                 |                                                                               |                                                                              |                                                                   |     |    |                                                                                                                                                                                                        |                                                                                                                                                                                                                                      |                                                                                                                                                                                                                                                                                                                                                                                     |           |                   |                                                                                                                                                        |                                                                                                                                                                                                                                                                                                                                                                      |                                                                                                                                                                                                                |
|------------------------------|--------|---------------------------------------------------------------|-----------------|-------------------------------------------------------------------------------|------------------------------------------------------------------------------|-------------------------------------------------------------------|-----|----|--------------------------------------------------------------------------------------------------------------------------------------------------------------------------------------------------------|--------------------------------------------------------------------------------------------------------------------------------------------------------------------------------------------------------------------------------------|-------------------------------------------------------------------------------------------------------------------------------------------------------------------------------------------------------------------------------------------------------------------------------------------------------------------------------------------------------------------------------------|-----------|-------------------|--------------------------------------------------------------------------------------------------------------------------------------------------------|----------------------------------------------------------------------------------------------------------------------------------------------------------------------------------------------------------------------------------------------------------------------------------------------------------------------------------------------------------------------|----------------------------------------------------------------------------------------------------------------------------------------------------------------------------------------------------------------|
|                              |        | physically demanding jobs                                     |                 |                                                                               | for intervention group and 40.4 for control group                            |                                                                   |     |    | consisting of (1) change in hospital policy (e.g., changes in work schedules, equipment, methods), (2) exercise and nutrition interventions, (3) ergonomics changes and (4) psychological intervention | Four 1-h exercise sessions, and one nutrition session and one cardiovascular session.<br><br>Six weekly sessions for ergonomics /2 individual and 4 group sessions).<br><br>3 1-h individual sessions for psychological intervention |                                                                                                                                                                                                                                                                                                                                                                                     |           |                   |                                                                                                                                                        | Self-reported data not differ between intervention and control groups<br><br>absence days did not differ between intervention and control groups<br><br>General health was assessed by the 36-item short form health survey<br><br>Job satisfaction was assessed using the Psychosocial Aspects of Work<br><br>Work ability, self-rated health, and sickness absence |                                                                                                                                                                                                                |
| von Thiele Schwarz 2015 [39] | Sweden | Healthcare workers (majority were nurses or assistant nurses) | Cluster RCT     | 12 and 24 months                                                              | Mean age 46.7 ± 9.2 for intervention group and 45.0 ± 12.1 for control group | 96.4% of intervention group and 91.2% of control group were women | 111 | 91 | 202                                                                                                                                                                                                    | Integration of health protection and health promotion into continuous improvement system (Kaizen)                                                                                                                                    | 1 to 4 short meetings per month at the unit level for continuous identification of risks for Kaizen, 1-h weekly exercise session plus lectures on healthy lifestyles for health promotion, and a monthly meeting at the unit level and annual safety inspections for health protection.<br><br>Integration was implemented through multiple workshops and over 20 coaching meetings | 24 months | During work hours | Health promotion and health protection were not integrated into Kaizen. Only annual safety inspection for health protection was integrated into Kaizen | Current workability and self-rated health were assessed using a single item<br><br>Information on frequency and duration of sickness absence during the past 12 months was collected using self-reports                                                                                                                                                              | Current work ability, self-rated health, and frequency and duration of sickness absence did not differ between intervention and control groups                                                                 |
| West 2014 [88]               | USA    | Practicing physicians                                         | Individualy RCT | 9-month intervention period, and 3- and 12-month post intervention follow-ups | Not reported                                                                 | 33.8% were women                                                  | 37  | 37 | 74                                                                                                                                                                                                     | A facilitated small-group curriculum consisting of mindfulness, reflection, shared experience, and learning                                                                                                                          | 1-h session every two weeks (a total of 19 sessions)                                                                                                                                                                                                                                                                                                                                | 9 months  | During work time  | No intervention                                                                                                                                        | Work engagement, burnout, and Job satisfaction<br><br>Burnout was measured using the Maslach Burnout Inventory<br><br>Work engagement was measured by the 12-item                                                                                                                                                                                                    | Intervention improved work engagement at 3-month ( <i>p</i> = 0.04) and 12-month ( <i>p</i> = 0.03) post intervention<br><br>Intervention reduced high depersonalization at 3-month ( <i>p</i> = 0.004) and 12 |

|                                  |           |                                                                                                         |             |                                                                                                                     |                                                                                                 |                  |                                                            |                                                            |                                                            |                                                                                                                            |                                                                                                                |           |                                                     |                                  |                                                                                                                       |  | Empowerment at Work Scale                                                                                                                                                                | months ( $p = 0.02$ ) post intervention                                                                            |
|----------------------------------|-----------|---------------------------------------------------------------------------------------------------------|-------------|---------------------------------------------------------------------------------------------------------------------|-------------------------------------------------------------------------------------------------|------------------|------------------------------------------------------------|------------------------------------------------------------|------------------------------------------------------------|----------------------------------------------------------------------------------------------------------------------------|----------------------------------------------------------------------------------------------------------------|-----------|-----------------------------------------------------|----------------------------------|-----------------------------------------------------------------------------------------------------------------------|--|------------------------------------------------------------------------------------------------------------------------------------------------------------------------------------------|--------------------------------------------------------------------------------------------------------------------|
|                                  |           |                                                                                                         |             |                                                                                                                     |                                                                                                 |                  |                                                            |                                                            |                                                            |                                                                                                                            |                                                                                                                |           |                                                     |                                  |                                                                                                                       |  | Job satisfaction was measured using the 12-item Physician Job Satisfaction Scale                                                                                                         | Emotional exhaustion, overall burnout, and job satisfaction did not differ between intervention and control groups |
| Christensen 2013 [38]            | Denmark   | Healthcare workers (majority were Overweight)                                                           | Cluster RCT | 3 and 12 months                                                                                                     | Mean age $44.8 \pm 9.5$ for intervention group and $46.4 \pm 9.5$ for control group             | 96.5% were women | 76                                                         | 68                                                         | 144                                                        | Intervention consisting of diet, strengthening and fitness exercises, and cognitive behavioral training                    | An hour per week                                                                                               | 12 months | During work time                                    | Lectures about healthy lifestyle | Work ability, and sickness absence                                                                                    |  | Work ability, number of days of short sickness absence and number of spells of short sickness absence did not differ between intervention and control groups at 3- or 12-month follow-up |                                                                                                                    |
|                                  |           |                                                                                                         |             |                                                                                                                     |                                                                                                 |                  |                                                            |                                                            |                                                            |                                                                                                                            |                                                                                                                |           |                                                     |                                  |                                                                                                                       |  | Job satisfaction and injuries                                                                                                                                                            |                                                                                                                    |
| Jeon 2013 [123]                  | Australia | Care workers of aged care homes (76% were unlicensed assistants in nursing or personal care assistants) | Cluster RCT | 9 and 18 months from the baseline (the 2nd follow-up was conducted six months after completion of the intervention) | Mean age at baseline 46.5 years for intervention group and 47.1 years for control group         | Not reported     | 202 at baseline, 229 at follow-up 1 and 240 at follow-up 2 | 301 at baseline, 315 at follow-up 1 and 342 at follow-up 2 | 503 at baseline, 544 at follow-up 1 and 582 at follow-up 2 | A leadership and management program (an educational and support program for middle managers)                               | A workshop, individual meetings/teleconferences every 4–6 weeks, coaching/mentoring, and peer support meetings | 12 months | Workplace                                           | No intervention                  | Job satisfaction was assessed using a single item (a 10-point Likert scale) from the Workforce Dynamics Questionnaire |  | Job satisfaction and fall with injury did not differ between intervention and control groups                                                                                             |                                                                                                                    |
|                                  |           |                                                                                                         |             |                                                                                                                     |                                                                                                 |                  |                                                            |                                                            |                                                            |                                                                                                                            |                                                                                                                |           |                                                     |                                  |                                                                                                                       |  | Fall with injury was assessed using register data during the follow-up                                                                                                                   |                                                                                                                    |
| Kontio 2011 [151] and 2013 [124] | Finland   | Nurses                                                                                                  | Cluster RCT | 3 (post-intervention) and 9 months                                                                                  | 24–64 years. Mean age $43 \pm 9$ for intervention group and $45 \pm 10$ years for control group | 54% were women   | 95                                                         | 63                                                         | 158                                                        | ‘ePsychNurse.Net’ eLearning course consisting of six main modules. Each module includes reading material, peer discussion, | 120 h                                                                                                          | 3 months  | One-third work hours and two-third nurses’ own time | No intervention                  | Job satisfaction was measured using the 14-item Job Satisfaction Scale                                                |  | Job satisfaction did not differ between intervention and control groups at 3- and 9-month follow-ups                                                                                     |                                                                                                                    |



|                                         |                 |                                                                  |             |                 |                                                                                                                         |                                                                                                     |                                                                      |     |     |                                                                                                                                                                                                                      |                                                                                                                                                                                                                                     |                  |                  |                                                          |                                                                                          |                                                                                                                                                                                                    |
|-----------------------------------------|-----------------|------------------------------------------------------------------|-------------|-----------------|-------------------------------------------------------------------------------------------------------------------------|-----------------------------------------------------------------------------------------------------|----------------------------------------------------------------------|-----|-----|----------------------------------------------------------------------------------------------------------------------------------------------------------------------------------------------------------------------|-------------------------------------------------------------------------------------------------------------------------------------------------------------------------------------------------------------------------------------|------------------|------------------|----------------------------------------------------------|------------------------------------------------------------------------------------------|----------------------------------------------------------------------------------------------------------------------------------------------------------------------------------------------------|
| van de Ven 2013 [119]                   | The Netherlands | Nursing staff of care homes for people with dementia             | Cluster RCT | 4 and 8 months  | Mean age 43.0 ± 10.9 years                                                                                              | 98.4% were women                                                                                    | 141                                                                  | 178 | 319 | reflective journal, and individual exercise and assignment                                                                                                                                                           | Training two mappers for each care home, running dementia-care mapping briefing day for organization and carrying out observation, feedback, and action plans twice for a period of two months each with an interval of four months | 4 months         | Workplace        | No intervention                                          | Job satisfaction was measured using the Maastricht Job Satisfaction Scale for Healthcare | Job satisfaction did not differ between intervention and control groups                                                                                                                            |
| Flannery 2012 [30]                      | USA             | Minority nursing assistants working at long-term care facilities | Cluster RCT | 6 months        | Mean age 41.8 ± 13.0 years                                                                                              | Women                                                                                               | 24                                                                   | 15  | 39  | A 2-h session to assess work factors affecting health, a 30-min educational lecture to encourage participants to increase physical activity and reduce fat and salt consumption, and ongoing motivation for 3 months | Weekly                                                                                                                                                                                                                              | 12 weeks         | During work time | A 30-min education session on physical activity and diet | The effort reward and imbalance were assessed using the 16-item questionnaire            | Work ability index increased in intervention group and decreased in control group during follow-up. The difference between the group was significant ( $p = 0.049$ )                               |
| van der Molen 2011 [152] and 2012 [139] | The Netherlands | Healthcare workers of one academic hospital                      | Cluster RCT | 6 and 12 months | Mean age 36 ± 12.8 years for needle safety device plus workshop group, 41 ± 11.7 years for workshop group and 38 ± 11.7 | 78% of needle safety device plus workshop of 83% workshop group and 75% of control group were women | 267 for needle safety device plus workshop and 263 for workshop only | 266 | 796 | Needle safety device plus an hour workshop, or workshop only                                                                                                                                                         | One time only                                                                                                                                                                                                                       | An hour workshop | Workplace        | No intervention                                          | The number of self-reported and registered needle stick injuries in the past 6 months    | The proportion of workers with self-reported needle stick injuries was lower in needle safety device plus workshop group (OR 0.34, 95% CI 0.13–0.91) and workshop only (OR 0.45, 95% CI 0.19–1.06) |



|                    |         |                                                   |                  |                                                                      |                                                                 |                  |                                                                       |    |     |                                                                                                                                                                |                                                                                                                                                                                                        |            |                   |                 |                                                                                                                          |                                                                                                                                                             |
|--------------------|---------|---------------------------------------------------|------------------|----------------------------------------------------------------------|-----------------------------------------------------------------|------------------|-----------------------------------------------------------------------|----|-----|----------------------------------------------------------------------------------------------------------------------------------------------------------------|--------------------------------------------------------------------------------------------------------------------------------------------------------------------------------------------------------|------------|-------------------|-----------------|--------------------------------------------------------------------------------------------------------------------------|-------------------------------------------------------------------------------------------------------------------------------------------------------------|
| Günösen 2010 [97]  | Turkey  | Nurses                                            | Individual y RCT | Post-intervention and 6 months follow-up                             | Most aged 19–34 years                                           | Women only       | N = 30 coping training and N = 31 social support                      | 28 | 89  | (1) Coping training consisting of cognitive and the problem-solving coping strategies.<br><br>(2) Social support                                               | A 1.5–2 h weekly session                                                                                                                                                                               | 7 weeks    | During work hour  | No intervention | Burnout was measured with the Maslach Burnout Inventory                                                                  | unqualified nurses<br>Emotional exhaustion, depersonalization and personal accomplishment did not differ between the groups                                 |
| Bygren 2009 [51]   | Sweden  | Medical care staff                                | Individual y RCT | 8 weeks                                                              | Mean age 49.8 for intervention group and 50.4 for control group | 93.1% were women | 51                                                                    | 50 | 101 | Cultural participation (films, concerts, art exhibitions, or choir singing session)                                                                            | One session per week                                                                                                                                                                                   | 8 weeks    | Outside work      | No intervention | It was assessed using the short form health questionnaire (SF-36)<br>Job satisfaction                                    | The intervention improved physical health (difference 3.55 points, 7.5%)                                                                                    |
| Fillion 2009 [117] | Canada  | Palliative care nurses                            | Individual y RCT | Post-intervention and three months follow-up                         | Mean age 44.1 ± 10.6 years                                      | 99.1% were women | 56                                                                    | 53 | 109 | A meaning-centered intervention, an active coping strategy                                                                                                     | One session per week                                                                                                                                                                                   | Four weeks | Not reported      | No intervention | It was assessed using the 5-item General Satisfaction subscale of the Job Diagnostic Survey                              | Job satisfaction did not differ between intervention and control groups                                                                                     |
| Kuske 2009 [101]   | Germany | Caregivers of nursing homes                       | Cluster RCT      | Post-intervention and six months after completion of intervention    | Mean age 44 years                                               | 94% were women   | N = 38 training program in dementia care and N = 30 relaxation traing | 28 | 96  | One group received a training program in dementia care to improve caregivers' knowledge and competencies.<br><br>The second group received a relaxing training | An hour weekly session of training program in dementia care.<br><br>A 1-h weekly session of relaxation training such as muscle relaxation, breathing relaxation or guided imaginary journeys           | 13 weeks   | During work hours | No intervention | Burnout was measured with the Maslach Burnout Inventory                                                                  | Emotional exhaustion, depersonalization and personal accomplishment did not differ between the groups                                                       |
| Tveito 2009 [56]   | Norway  | Nurses working in a nursing home for older people | Individual y RCT | Post-intervention and one year follow-up (for sickness absence only) | Mean age 42.8 years                                             | Women only       | 19                                                                    | 21 | 40  | An integrated health program consisting of exercise, stress management, health information and an examination of workplace to cope with the job                | (1) one hour of aerobic dancing three times a week, (2) an hour weekly session (total 15 h) of education about stress, coping, health and lifestyle, and (3) an examination of the workplace on how to | 9 months   | During work hours | No intervention | Sickness absence, general health, demands, control, and effort reward imbalance<br><br>Register data on sickness absence | Sickness absence, general health, demands, control, and effort reward imbalance did not differ between intervention and control groups at post-intervention |

|                       |                 |                         |             |                                                                                                                |                                                                    |                  |    |    |     |                                                                                                      |                                                                                                                                                     |          |              |                 |  |  |                                                                                                                                              |                                                                             |
|-----------------------|-----------------|-------------------------|-------------|----------------------------------------------------------------------------------------------------------------|--------------------------------------------------------------------|------------------|----|----|-----|------------------------------------------------------------------------------------------------------|-----------------------------------------------------------------------------------------------------------------------------------------------------|----------|--------------|-----------------|--|--|----------------------------------------------------------------------------------------------------------------------------------------------|-----------------------------------------------------------------------------|
|                       |                 |                         |             |                                                                                                                |                                                                    |                  |    |    |     | organize and cope with the job                                                                       |                                                                                                                                                     |          |              |                 |  |  | for one year after the intervention                                                                                                          | The intervention also had no effect on sickness absence at 1-year follow-up |
|                       |                 |                         |             |                                                                                                                |                                                                    |                  |    |    |     |                                                                                                      |                                                                                                                                                     |          |              |                 |  |  | General health was assessed using the 5-item of the generic health status inventory SF-36                                                    |                                                                             |
|                       |                 |                         |             |                                                                                                                |                                                                    |                  |    |    |     |                                                                                                      |                                                                                                                                                     |          |              |                 |  |  | Psychological demands were measured using the 5-item from short version of the Psychological Demands dimension from the demand/control model |                                                                             |
|                       |                 |                         |             |                                                                                                                |                                                                    |                  |    |    |     |                                                                                                      |                                                                                                                                                     |          |              |                 |  |  | Control was measured using the 6-item from short version of the Decision Latitude dimension from the demand/control model                    |                                                                             |
|                       |                 |                         |             |                                                                                                                |                                                                    |                  |    |    |     |                                                                                                      |                                                                                                                                                     |          |              |                 |  |  | Job satisfaction and professional performance                                                                                                |                                                                             |
|                       |                 |                         |             |                                                                                                                |                                                                    |                  |    |    |     |                                                                                                      |                                                                                                                                                     |          |              |                 |  |  | Job satisfaction was assessed using the 7 of the 13 subscales of the physician work-life survey                                              | The intervention had effect on professional performance ( $p < 0.001$ )     |
| Hugenholtz 2008 [106] | The Netherlands | Occupational physicians | Cluster RCT | Post-intervention and 7 months after baseline intervention (3 months after the completion of the intervention) | Mean age $48 \pm 5.8$ for group and $45 \pm 6.7$ for control group | 41.7% were women | 49 | 59 | 108 | An evidence-based medicine training program consisting of a course and case method learning sessions | The course consisted of three half-days within two weeks.<br><br>A 1- to 1.5- hour case method learning session every two weeks (total 10 sessions) | 4 months | Not reported | No intervention |  |  | Professional performance was assessed using self-reported information on                                                                     | Job satisfaction did not differ between intervention and control groups     |

|                       |         |                                                                                                                                                                |                |                                                       |                                                                             |                                                                   |                                                                               |    |     |                                                                                          |                                                                                                                                                                    |               |                                                                               |                 |                                                                                                                                                                                                                                                                                                                                                                                                                                                                                                                                                                                                                    |                                                                                                                                                                                                                                                                                                                                                                                                                                                                                                              |
|-----------------------|---------|----------------------------------------------------------------------------------------------------------------------------------------------------------------|----------------|-------------------------------------------------------|-----------------------------------------------------------------------------|-------------------------------------------------------------------|-------------------------------------------------------------------------------|----|-----|------------------------------------------------------------------------------------------|--------------------------------------------------------------------------------------------------------------------------------------------------------------------|---------------|-------------------------------------------------------------------------------|-----------------|--------------------------------------------------------------------------------------------------------------------------------------------------------------------------------------------------------------------------------------------------------------------------------------------------------------------------------------------------------------------------------------------------------------------------------------------------------------------------------------------------------------------------------------------------------------------------------------------------------------------|--------------------------------------------------------------------------------------------------------------------------------------------------------------------------------------------------------------------------------------------------------------------------------------------------------------------------------------------------------------------------------------------------------------------------------------------------------------------------------------------------------------|
| Peterson 2008<br>[54] | Sweden  | Healthcare workers, social workers, service staff, administrators, teachers, and technicians with burnout (exhaustion burnout score above the 75th percentile) | Individual RCT | Post-intervention, 7 and 12 months after intervention | Mean age 52.7 ± 5.6 for intervention group and 50.7 ± 6.7 for control group | 96.1% of intervention group and 83.8% of control group were women | 51                                                                            | 80 | 131 | A working peer-support group for stress and burnout                                      | A 2-h weekly session and a follow-up meeting 4 weeks after completion of first 10 sessions                                                                         | 10 weeks      | During work hours                                                             | No intervention | practice of keeping up-to-date and using knowledge in daily practice<br>Burnout, perceived general health, quantitative demands, and work participation<br>Burnout was measured using the 16-item Oldenburg Burnout Inventory and consists of two subscales (exhaustion and disengagement)<br>General health was assessed by the five items of the Short Form health survey<br>Quantitative demands such as overtime and workload were assessed using the General Nordic Questionnaire for Psychological and Social Factors at Work<br>Work participation was assessed using a single question<br>Sickness absence | Perceived general health ( $p = 0.010$ ) improved and quantitative demands ( $p = 0.014$ ) decreased at 12-month follow-up in the intervention group compared with control group<br>Exhaustion and disengagement did not differ between two groups at 12-month follow-up<br>Work participation was higher in intervention group compared with control group at 12-month follow (between-group difference 16.2%, 95% CI 5.2–29.7%)<br>Sickness absence did not differ between intervention and control groups |
| Warming 2008<br>[138] | Denmark | Nurses                                                                                                                                                         | Cluster RCT    | 12 months                                             | Mean age 34.8 years                                                         | 90% were women                                                    | N = 55 for transfer technique and N = 50 for transfer technique plus physical | 76 | 181 | Education of patient transfer technique.<br>Education of patient transfer technique plus | Two nurses from each ward received a 4-day training for transfer technique and then they introduced transfer technique to their colleagues for two 6-week periods. | 8 to 12 weeks | Education of transfer technique during work hours and 50% of physical fitness | No intervention | Self-reported information on sickness absence due to low back pain during 12-month follow-up                                                                                                                                                                                                                                                                                                                                                                                                                                                                                                                       | Sickness absence did not differ between intervention and control groups                                                                                                                                                                                                                                                                                                                                                                                                                                      |

|                         |                        |                                                                                                                                                               |                     |                                          |                                                                                                                         |                               | fitness<br>training |     |     | physical fitness<br>training                                                                              | 1-h supervised aerobic<br>fitness and strength<br>training twice a week<br>for 8 weeks | training<br>during<br>work hours |                        |                                                                                                   |                                                                                                                                                                                                                                               |                                                                                                                                                                                                                                                                                                                               |
|-------------------------|------------------------|---------------------------------------------------------------------------------------------------------------------------------------------------------------|---------------------|------------------------------------------|-------------------------------------------------------------------------------------------------------------------------|-------------------------------|---------------------|-----|-----|-----------------------------------------------------------------------------------------------------------|----------------------------------------------------------------------------------------|----------------------------------|------------------------|---------------------------------------------------------------------------------------------------|-----------------------------------------------------------------------------------------------------------------------------------------------------------------------------------------------------------------------------------------------|-------------------------------------------------------------------------------------------------------------------------------------------------------------------------------------------------------------------------------------------------------------------------------------------------------------------------------|
| Yamagishi<br>2008 [129] | Japan                  | Shift-working<br>nurses                                                                                                                                       | Individual<br>y RCT | 3 weeks                                  | Mean age<br>33.0 ± 7.1<br>years                                                                                         | Not<br>reported               | 26                  | 25  | 51  | A web-based<br>career identity<br>training for stress<br>management                                       | A 2-h training session                                                                 | One session<br>only              | At hospital<br>or home | No intervention                                                                                   | Workload, job<br>control and<br>reward from work<br>They were<br>assessed using the<br>20-item Job Stress<br>Brief<br>Questionnaire                                                                                                           | Workload, job<br>control and<br>reward from<br>work did not<br>differ between<br>intervention and<br>control group                                                                                                                                                                                                            |
| Le Blanc 2007<br>[77]   | The<br>Netherland<br>s | Oncology<br>healthcare<br>workers                                                                                                                             | Cluster<br>RCT      | 6 and 12<br>months after<br>the baseline | Mean age<br>36.2 ± 8.4<br>years                                                                                         | Probably<br>72% were<br>women | 260                 | 404 | 664 | A team-based<br>support group<br>meetings to<br>discuss and<br>identify solutions<br>for<br>job stressors | A 3-h monthly session                                                                  | 6 months                         | Workplace              | No intervention                                                                                   | Burnout<br><br>Emotional<br>exhaustion and<br>depersonalization<br>were assessed<br>using the Dutch<br>version the<br>Maslach Burnout<br>Inventory—<br>Human Services<br>Survey                                                               | Emotional<br>exhaustion was<br>lower in<br>intervention<br>group than<br>control group at<br>both 6- and 12-<br>month follow-ups                                                                                                                                                                                              |
| Roelofs 2007<br>[133]   | The<br>Netherland<br>s | Home care<br>workers with<br>current non-<br>specific low<br>back pain or<br>history of 2 or<br>more episodes<br>of low back<br>pain in the<br>past 12 months | Individual<br>y RCT | 12 months                                | 19–62<br>years.<br>Mean age<br>41.8 ± 9.7<br>for<br>interventio<br>n group<br>and 41.5 ±<br>9.8 for<br>control<br>group | 97.8% were<br>women           | 183                 | 177 | 360 | A lumbar support<br>plus usual care                                                                       | Wearing a lumbar<br>support on<br>working days                                         | 12 months                        | Workplace              | Control group<br>received a short<br>course on<br>healthy<br>working<br>methods and<br>usual care | Sickness absence<br><br>Register data on<br>the number of<br>sickness absence<br>days for 12<br>months follow-up<br><br>Self-reported data<br>on the number of<br>sickness absence<br>days due to low<br>back pain for 12<br>months follow-up | The number of<br>registered all-<br>cause sickness<br>absence days did<br>not differ<br>between<br>intervention and<br>control groups<br>(difference −5.0<br>days, 95% CI<br>−21.1 to 6.8 days,<br><i>p</i> = 0.45)<br><br>The number of<br>self-reported<br>sickness absence<br>days due to low<br>back pain was<br>lower in |



|                      |        |                                                 |                  |                                                                                |                                                                                |                                                               |    |    |     |                                                                                                                                                                      |                                                                                                                                    |          |              |                                     |                                                                                                                        |                                                                                                                                                                                                                                                                                                       |
|----------------------|--------|-------------------------------------------------|------------------|--------------------------------------------------------------------------------|--------------------------------------------------------------------------------|---------------------------------------------------------------|----|----|-----|----------------------------------------------------------------------------------------------------------------------------------------------------------------------|------------------------------------------------------------------------------------------------------------------------------------|----------|--------------|-------------------------------------|------------------------------------------------------------------------------------------------------------------------|-------------------------------------------------------------------------------------------------------------------------------------------------------------------------------------------------------------------------------------------------------------------------------------------------------|
| Brox 2005 [134]      | Norway | Employees of a community nursing home           | Individual y RCT | 6 months                                                                       | Mean age 42.5 years                                                            | 97% of intervention group and 96% of control group were women | 63 | 56 | 119 | scheduling system for their team<br><br>Intervention consisting of light aerobic, strengthening and stretching exercises                                             | An hour session per week.<br><br>Classes of physical exercise, nutrition, and stress management were also offered                  | 6 months | Workplace    | No intervention                     | Sickness absence<br><br>Register data on sickness absence                                                              | Number of self-certified and doctor-certified sickness absences did not differ between intervention and control groups during the follow-up period<br>Emotional exhaustion reduced ( $p = 0.050$ ) and personal accomplishment improved ( $p = 0.014$ ) more in intervention group than control group |
| Cohen-Katz 2005 [69] | USA    | Nurses                                          | Individual y RCT | Post-intervention                                                              | 32–60 years. Mean age 46 years                                                 | Women only                                                    | 14 | 13 | 27  | A mindfulness-based stress reduction intervention                                                                                                                    | A 2.5-h weekly session, a full day (6 h) retreat and home practices for 6 days per week                                            | 8 weeks  | Not reported | No intervention                     | Burnout was measured by the 22-item Maslach Burnout Inventory                                                          | Depersonalization reduced more in intervention group than control group, but the difference did not reach statistical significance ( $p = 0.063$ )                                                                                                                                                    |
| Löck 2000 [103]      | Sweden | Nurses and nursing aides of two geriatric wards | Cluster RCT      | Post-intervention and 10 weeks after the intervention (30 weeks from baseline) | 20–62 years. Mean age 39 years for intervention and 37 years for control group | 96.2% were women                                              | 14 | 12 | 26  | Management change on psychosocial factors consisting of an initial education about stressors and stress management followed by practical problem-solving discussions | 1-h once a week. Due to work schedules, every participant was able to attend the meetings once every two weeks (total 10 sessions) | 20 weeks | Workplace    | A routine staff meeting once a week | Burnout, job demands and job control.<br><br>Job demands and job control were measured using a validated questionnaire | Work demand increased in intervention ward compared to control ward at 30-week follow-up but not at 20-week follow-up<br><br>Burnout was assessed using a single question<br>Work control and burnout did not differ between intervention and                                                         |



|                      |        |                                                  |                  |           |                                  |                                |    |    |    |                                                      |                                                                                                                                                                     |                         |                   |                 |                                                                           |                                                                                                                                           |
|----------------------|--------|--------------------------------------------------|------------------|-----------|----------------------------------|--------------------------------|----|----|----|------------------------------------------------------|---------------------------------------------------------------------------------------------------------------------------------------------------------------------|-------------------------|-------------------|-----------------|---------------------------------------------------------------------------|-------------------------------------------------------------------------------------------------------------------------------------------|
| Gundewall 1993 [131] | Sweden | Nurses and nursing aides of a geriatric hospital | Individual y RCT | 13 months | 18–58 years                      | Women (there was only one man) | 28 | 32 | 60 | Strengthening, endurance, and coordination exercises | On average 6 times per month                                                                                                                                        | During follow-up period | During work hours | No intervention | Number of persons on sick leave due to a back complaint                   | control wards at 20- and 30-week follow-up                                                                                                |
|                      |        |                                                  |                  |           |                                  |                                |    |    |    |                                                      |                                                                                                                                                                     |                         |                   |                 |                                                                           | 1 of 28 participants in intervention group and 12 of 32 controls had been on sick leave.                                                  |
|                      |        |                                                  |                  |           |                                  |                                |    |    |    |                                                      |                                                                                                                                                                     |                         |                   |                 |                                                                           | Estimated RR 0.10 (CI 0.01–0.69)                                                                                                          |
| Linton 1989 [135]    | Sweden | Nurses and nursing aides with back pain          | Individual y RCT | 6 months  | 20–59 years. Median age 43 years | Women only                     | 36 | 30 | 66 | Physical and behavioral preventive intervention      | 8 h a day on weekdays including various exercises (walking, swimming, jogging, cycling, etc.) for 4 h/day, ergonomic education, and behavioral therapy twice a week | 5 weeks                 | During work hours | No intervention | Sickness absence Register data on sickness absence for 6 months follow-up | Number of sickness absence days due to musculoskeletal problems or other illnesses did not differ between intervention and control groups |
